# Supplementary material
Source: ML conference proceedings conference paper supplement (https://openaccess.thecvf.com/content/ICCV_2019/html/Weir_SpaceNet_MVOI_A_ICCV_2019_paper.html)
Supplement: Supplementary file 1 [file Weir_SpaceNet_MVOI_A_ICCV_2019_supplemental.pdf]

# SpaceNet MVOI: a Multi-View Overhead Imagery Dataset

## Supplementary Material

Nicholas Weir<sup>1</sup>, David Lindenbaum<sup>2</sup>, Alexei Bastidas<sup>3</sup>, Adam Van Etten<sup>1</sup>, Sean McPherson<sup>3</sup>, Jacob Shermeyer<sup>1</sup>, Varun Kumar<sup>3</sup>, and Hanlin Tang<sup>3</sup>

<sup>1</sup>In-Q-Tel CosmiQ Works, [nweir, avanetten, jshermeyer]@iqt.org

<sup>2</sup>Accenture Federal Services, david.lindenbaum@accenturefederal.com

<sup>3</sup>Intel AI Lab, [alexei.a.bastidas, sean.mcpherson, varun.v.kumar, hanlin.tang]@intel.com

### A. Dataset

#### A.1. Imagery details

The images from our dataset were obtained from DigitalGlobe, with 27 different viewing angles collected over the same geographical region of Atlanta, GA. Each viewing angle is characterized as both an off-nadir angle and a target azimuth. We binned each angle into one of three categories (Nadir, Off-Nadir, and Very Off-Nadir) based on the angle (see Table 2). Collects were also separated into South- or North-facing based on the target azimuth angle.

The imagery dataset comprises Panchromatic, Multi-Spectral, and Pan-Sharpended Red-Green-Blue-near IR (RGB-NIR) images. The ground resolution of image varied depending on the viewing angle and the type of image (Panchromatic, Multi-spectral, Pan-sharpened). See Table 1 for more details. All experiments in this study were performed using the Pan-Sharpended RGB-NIR image (with the NIR band removed, except for the U-Net model).

The imagery was uploaded into the spacenet-dataset AWS S3 bucket, which is publicly readable with no cost to download. Download instructions can be found at [www.spacenet.ai/off-nadir-building-detection/](http://www.spacenet.ai/off-nadir-building-detection/).

| Image          | Resolution at 7.8° | Resolution at 54° |
|----------------|--------------------|-------------------|
| Panchromatic   | 0.46m/px           | 1.67m/px          |
| Multi-spectral | 1.8m/px            | 7.0m/px           |
| Pan-sharpened  | 0.46m/px           | 1.67m/px          |

Table 1: Resolution across different image types for two nadir angles.

#### A.2. Dataset breakdown

The imagery described above was split into three folds: 50% in a training set, 25% in a validation set, and 25% in a final test set. 900 × 900-pixel geographic tiles were randomly placed in one of the three categories, with all of the look angles for a given geography assigned to the same subset to avoid geographic leakage. The full training set and building footprint labels as well as the validation set imagery were open sourced, and the validation set labels and final test imagery and labels were withheld as scoring sets for public coding challenges.

### B. Model Training

#### B.1. TernausNet

The TernausNet model was trained without pre-trained weights roughly as described previously [5], with modifications. Firstly, only the Pan-sharpened RGB channels were used for training, and were re-scaled to 8-bit. 90° rotations, X and Y flips, imagery zooming of up to 25%, and linear brightness adjustments of up to 50% were applied randomly to training images. After augmentations, a 512 × 512 crop was randomly selected from within each 900 × 900 training chip, with one crop used per chip per training epoch. Secondly, as described in the Models section of the main text, a combination loss function was used with a weight parameter  $\alpha = 0.8$ . Secondly, a variant of Adam incorporating Nesterov momentum [1] with default parameters was used as the optimizer. The model was trained for 25-40 epochs, and learning rate was decreased 5-fold when validation loss failed to improve for 5 epochs. Model training was halted when validation loss failed to improve for 10 epochs.

| Catalog ID       | Pan-sharpened Resolution | Look Angle | Target Azimuth Angle | Angle Bin      | Look Direction |
|------------------|--------------------------|------------|----------------------|----------------|----------------|
| 1030010003D22F00 | 0.48                     | 7.8        | 118.4                | Nadir          | South          |
| 10300100023BC100 | 0.49                     | 8.3        | 78.4                 | Nadir          | North          |
| 1030010003993E00 | 0.49                     | 10.5       | 148.6                | Nadir          | South          |
| 1030010003CAF100 | 0.48                     | 10.6       | 57.6                 | Nadir          | North          |
| 1030010002B7D800 | 0.49                     | 13.9       | 162                  | Nadir          | South          |
| 10300100039AB000 | 0.49                     | 14.8       | 43                   | Nadir          | North          |
| 1030010002649200 | 0.52                     | 16.9       | 168.7                | Nadir          | South          |
| 1030010003C92000 | 0.52                     | 19.3       | 35.1                 | Nadir          | North          |
| 1030010003127500 | 0.54                     | 21.3       | 174.7                | Nadir          | South          |
| 103001000352C200 | 0.54                     | 23.5       | 30.7                 | Nadir          | North          |
| 103001000307D800 | 0.57                     | 25.4       | 178.4                | Nadir          | South          |
| 1030010003472200 | 0.58                     | 27.4       | 27.7                 | Off-Nadir      | North          |
| 1030010003315300 | 0.61                     | 29.1       | 181                  | Off-Nadir      | South          |
| 10300100036D5200 | 0.62                     | 31         | 25.5                 | Off-Nadir      | North          |
| 103001000392F600 | 0.65                     | 32.5       | 182.8                | Off-Nadir      | South          |
| 1030010003697400 | 0.68                     | 34         | 23.8                 | Off-Nadir      | North          |
| 1030010003895500 | 0.74                     | 37         | 22.6                 | Off-Nadir      | North          |
| 1030010003832800 | 0.8                      | 39.6       | 21.5                 | Off-Nadir      | North          |
| 10300100035D1B00 | 0.87                     | 42         | 20.7                 | Very Off-Nadir | North          |
| 1030010003CCD700 | 0.95                     | 44.2       | 20                   | Very Off-Nadir | North          |
| 1030010003713C00 | 1.03                     | 46.1       | 19.5                 | Very Off-Nadir | North          |
| 10300100033C5200 | 1.13                     | 47.8       | 19                   | Very Off-Nadir | North          |
| 1030010003492700 | 1.23                     | 49.3       | 18.5                 | Very Off-Nadir | North          |
| 10300100039E6200 | 1.36                     | 50.9       | 18                   | Very Off-Nadir | North          |
| 1030010003BDDC00 | 1.48                     | 52.2       | 17.7                 | Very Off-Nadir | North          |
| 1030010003193D00 | 1.63                     | 53.4       | 17.4                 | Very Off-Nadir | North          |
| 1030010003CD4300 | 1.67                     | 54         | 17.4                 | Very Off-Nadir | North          |

Table 2: DigitalGlobe Catalog IDs and the resolution of each image based upon off-nadir angle and target azimuth angle.

## B.2. U-Net

The original U-Net [7] architecture was trained for 30 epochs with Pan-Sharpended RGB+NIR 16-bit imagery, on a binary segmentation mask with a combination loss as described in the main text with  $\alpha = 0.5$ . Dropout and batch normalization were used at each layer, with dropout with  $p = 0.33$ . The same augmentation pipeline was used as with TerausNet. An Adam Optimizer [6] was used with learning rate of 0.0001 was used for training.

| Type       | NADIR | OFF - NADIR | VOFF - NADIR |
|------------|-------|-------------|--------------|
| Industrial | 0.51  | -0.13       | -0.28        |
| Sparse Res | 0.57  | -0.19       | -0.37        |
| Dense Res  | 0.66  | -0.21       | -0.41        |
| Urban      | 0.64  | -0.13       | -0.30        |

Table 3:  $F_1$  score for the model trained on all angles and evaluated on the nadir bins (NADIR), then the relative decrease in  $F_1$  for the off-nadir and very off-nadir bins.

## B.3. YOLT

The You Only Look Twice (YOLT) model was trained as described previously [2]. Bounding box training targets were generated by converting polygon building footprints into the minimal un-oriented bounding box that enclosed each polygon.

## B.4. Mask R-CNN

The Mask R-CNN model with the ResNet50-C4 backbone was trained as described previously [4] using the same augmentation pipeline as TerausNet. Bounding boxes were created as described above for YOLT.

## C. Geography-specific performance

### C.1. Distinct geographies within SpaceNet MVOI

We asked how well the TerausNet model trained on SpaceNet MVOI performed both within and outside of the dataset. First, we broke down the test dataset into the four bins represented in main text Figure 1: Industrial, Sparse Residential, Dense Residential, and Urban, and

scored models within those bins (Table 3). We observed slightly worse performance in Industrials areas than elsewhere at nadir, but markedly stronger drops in performance in residential areas as look angle increased.

## C.2. Generalization to unseen geographies

We also explored how models trained on SpaceNet MVOI performed on building footprint extraction from imagery from other geographies, in this case, the Las Vegas imagery from SpaceNet [3]. After normalizing the Las Vegas (LV) imagery for consistent pixel intensities and channel order with SpaceNet MVOI, we predicted building footprints in LV imagery and scored prediction quality as described in Metrics. We also re-trained TerausNet on the LV imagery and examined building footprint extraction quality on the SpaceNet MVOI test set. Strikingly, neither model was able to identify building footprints in the unseen geographies, highlighting that adding novel looks angles does not necessarily enable generalization to new geographic areas.

|              |          | Test Set |       |
|--------------|----------|----------|-------|
|              |          | MVOI 7°  | SN LV |
| Training Set | MVOI ALL | 0.68     | 0.01  |
|              | SN LV    | 0.00     | 0.62  |

Table 4: **Cross-dataset  $F_1$** . Models trained on MVOI or SpaceNet Las Vegas [3] were inferred on held out imagery from one of those two geographies, and building footprint quality was assessed as described in Metrics.

## References

- [1] Timothy Dozat. Incorporating nesterov momentum into adam. In *The 2016 International Conference on Learning Representations Workshops*, 2016.
- [2] Adam Van Etten. You only look twice: Rapid multi-scale object detection in satellite imagery. *CoRR*, abs/1805.09512, 2018.
- [3] Adam Van Etten, Dave Lindenbaum, and Todd M. Bacastow. SpaceNet: A Remote Sensing Dataset and Challenge Series. *CoRR*, abs/1807.01232, 2018.
- [4] Kaiming He, Georgia Gkioxari, Piotr Dollar, and Ross Girshick. Mask R-CNN. In *The 2017 IEEE International Conference on Computer Vision (ICCV)*, Oct 2017.
- [5] Vladimir Iglovikov and Alexey Shvets. Terausnet: U-net with VGG11 encoder pre-trained on imagenet for image segmentation. *CoRR*, abs/1801.05746, 2018.
- [6] Diederik P. Kingma and Jimmy Ba. Adam: A method for stochastic optimization. In *3rd International Conference on Learning Representations, ICLR 2015, San Diego, CA, USA, May 7-9, 2015, Conference Track Proceedings*, 2015.
- [7] Olaf Ronneberger, Philipp Fischer, and Thomas Brox. U-Net - Convolutional Networks for Biomedical Image Segmentation. *MICCAI*, 9351(Chapter 28):234–241, 2015.
